# Supplementary material
Source: PubMed Central journal article supplement (PMC8765193)
Supplement: LSHSS-50-493-s001.pdf [file LSHSS-50-493-s001.pdf]

**Supplemental Material S1.** This figure illustrates how students are guided to make connections between high-frequency words in Spanish or other Latinate languages to support learning of Latin roots.

**Spanish Friend (1 minute) (Word Roots Chart)**

Point to the Latin branch of the Indo-European trunk on the Language Family Tree to remind students why many words in the Latin branch of the Language Family Tree have Latin roots. Tell students that they are going to learn the Spanish friend for the root *dic/dict*.

Write the word *dice* on the class chart and have the students add the Spanish Friend to their Word Roots Chart. Ask the students:

- **Does anyone know what this Spanish word means?** Give the meaning if necessary. [See the information chart below.]
- **What is the connection between the meaning of the Spanish word and the meaning of the root?** Guide students to the idea that the meaning of the Spanish word is so close to the meaning of the root that knowing the word can help you remember the root.
- **Do you know of any friends with these roots from other languages?** [Students who speak other Romance languages might notice additional connections to the Latin roots. The information chart below will help you confirm these connections. If students volunteer friends in other languages, ask them what the word means and how it connects to the root.]

Note: The charts below are a resource for the teacher.

**Information about the Spanish friend word**

| Root Meaning | Root            | Spanish Friend | Pronunciation | Meaning |
|--------------|-----------------|----------------|---------------|---------|
| tell/speak   | <i>dic/dict</i> | dice           | DEE - say     | he says |

**Information about other possible Romance language friend words**

| Root            | French | Italian  | Portuguese | Romanian |
|-----------------|--------|----------|------------|----------|
| <i>dic/dict</i> | dicter | indicare | indicar    | indica   |
