# Supplementary material
Source: PubMed Central journal article supplement (PMC8765193)
Supplement: LSHSS-50-493-s002.pdf [file LSHSS-50-493-s002.pdf]

**Supplemental Material S2.** This figure illustrates how students are taught to take a problem-solving stance using Latin roots to infer meanings unfamiliar words. In addition to the target academic word, students use the target root meaning to analyze the meaning of a new academic word, creating semantic connections and expanding vocabulary growth.

**Make the Connection (8 minutes) (Student Book, p. 7)**

Apply the root meaning to root-related words.

**We have seen how the meaning of a Latin root can be a clue to help us remember the meaning of a vocabulary word and root-related word. Today, we're going to practice using the meaning of the root to help us figure out the meaning of one other word with each root.**

**Indicate: dic/dict**

- **Now let's figure out another root-related word with the same root as our word *indicate*. What is the root in *indicate*?** Have students write the root beside the word.
- **Let's try with another root-related word: *dictate*.**
- **Ask a student to read the sentence: *The dress code dictates what we can wear to school. Who sees a root hiding in *dictates*? Spell it. Box it.***
- **So, if the dress code *dictates* what students can wear to school, what does that mean?** Guide students to the idea that when you *dictate* something to someone, you TELL them what they have to do.
- **Write *dictate* on the chart in the root-related words column, and have students do the same. See the root d-i-c-t in all these words?**
