# Supplementary material
Source: PubMed Central journal article supplement (PMC8765193)
Supplement: LSHSS-50-493-s003.pdf [file LSHSS-50-493-s003.pdf]

**Supplemental Material S3.** This figure illustrates how students are taught use target root meanings to analyze meanings of additional root-related words, further expanding semantic connections and promoting vocabulary growth.

**Using Clues to Figure Out Root-Related Words (8 minutes) (Student Book, p. 23)**

Tell students that in this activity they have another opportunity to figure out the meaning of a new root-related word to add a fourth example to the group of words with a common root. Add the new root-related words to the class Word Roots Chart and have the students do the same.

As a group, they will:

- box the root in the vocabulary word and all root-related words
- write the meaning of the root on the line beside it
- use the meaning of the root and the clues in the sentence to figure out the meaning of the new root-related word
- use the word and the information in the sentence to answer the question

**1. TARGET WORD: indicate**                      **Root:** \_\_\_\_\_

I *contradicted* my neighbor when he said climate change isn't real, and I said it is real.

[indicate is SAYING what something is; contradict is SAYING the opposite of what someone else says]

**Was that a good idea?**
