# Supplementary material
Source: PubMed Central journal article supplement (PMC8765193)

**Supplemental Material S4.** This figure illustrates how students are taught use target root meanings to analyze meanings of additional root-related words.

**Use the Latin Root with a Root-Related Word (3 minutes) (Student Book, p. 10)**

- **Everyone, spell the root that means "truth." Let's try using v-e-r for a new word.**
- **Let's look at the sentence and the picture of the fingerprint scanner.**
- Ask a student to read the sentence: **Some machines now use fingerprints to *verify* a person's identity. Who sees a root hiding in *verify*? Spell it. Box it.**
- **What does v-e-r mean?** Have students write, "truth" underneath and draw an arrow from the root to the meaning.
- **So, if the machine can use your fingerprint to *verify* your identity, what does that mean?** Guide students to the idea that when you *verify* something you check it carefully to be sure it's TRUE.
- **We call *verify* a root-related word since it has the same root as our word *veracity*.** Write *verify* on the chart in the root-related words column, and have students do the same.
- **See the root v-e-r in these words?**

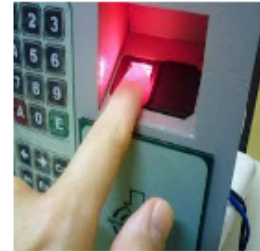

Supplement: LSHSS-50-493-s004.pdf [file LSHSS-50-493-s004.pdf]
