# Supplementary material
Source: PubMed Central journal article supplement (PMC8765193)

**Supplemental Material S5.** This figure illustrates how students are taught use target root meanings to analyze meanings of additional root-related words.

**Use the Latin Root with a Root-Related Word (3 minutes) (Student Book, p. 13)**

- **Everyone, spell the root that means "life." Let's try using v-i-v for a new word.**
- **Let's look at the sentence and the picture of the girl jumping.**
- **Ask a student to read the sentence: Things are always exciting when Carla is with us because she is so *vivacious*. Who sees a root hiding in *vivacious*? Spell it. Box it.**
- **What does v-i-v mean?** Have students write, "life" underneath and draw an arrow from the root to the meaning.
- **So, if someone is *vivacious*, what does that mean?**  
Guide students to the idea that someone *vivacious* is full of LIFE and fun to be around.
- **We call *vivacious* a root-related word since it has the same root as our word *survive*.**  
Write *vivacious* on the chart in the root-related words column, and have students do the same.
- **See the root v-i-v in these words?**

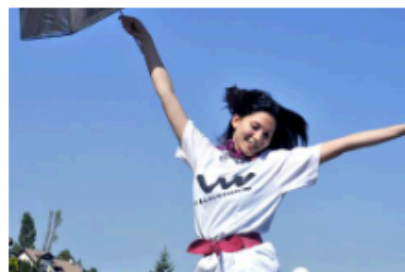

Supplement: LSHSS-50-493-s005.pdf [file LSHSS-50-493-s005.pdf]
