# Supplementary material
Source: PubMed Central journal article supplement (PMC8765193)
Supplement: LSHSS-50-493-s006.pdf [file LSHSS-50-493-s006.pdf]

**Supplemental Material S6.** This figure presents an example of a review activity to provide an opportunity for active processing of previously taught target words from several instructional cycles.

|                                                                                                |                    |
|------------------------------------------------------------------------------------------------|--------------------|
| EL-RAVE Student Materials                                                                      | Review: Cycles 1-4 |
| <b>Complete the Sentence (10 minutes)</b>                                                      |                    |
| 1. The <b>duration</b> of the _____ was _____.                                                 |                    |
| 2. The <b>consequences</b> of her decision to _____ were that _____.                           |                    |
| 3. "That is very <b>innovative!</b> " she said, as you showed her your _____ that could _____. |                    |
| 4. It is a <b>priority</b> to _____ when you _____.                                            |                    |
| 5. We <b>reside</b> in _____ that has _____.                                                   |                    |
| 6. The _____ was <b>confined</b> in the house because _____.                                   |                    |
| 7. The _____ were <b>unified</b> in the decision to _____.                                     |                    |
| 8. Let's <b>convene</b> at _____ to discuss _____.                                             |                    |
| 9. He was <b>isolated</b> from _____ when he _____.                                            |                    |
| 10. The <b>contemporary</b> _____ is very different from _____.                                |                    |
| 11. The teacher tries to <b>incorporate</b> _____ in _____.                                    |                    |
| 12. The <b>equivalent</b> of _____ is _____.                                                   |                    |
| 13. The <b>advocate</b> came to the _____ to support _____.                                    |                    |
| 14. A <b>significant</b> number of _____ complained about _____.                               |                    |
